# Supplementary material for: Tomato Genomic Resources Database: An Integrated Repository of Useful Tomato Genomic Information for Basic and Applied Research
Source: PLoS One. 2014 Jan 21;9(1):e86387. doi: 10.1371/journal.pone.0086387 (PMC3897720; doi:10.1371/journal.pone.0086387)
Supplement: Table S4 — Genomic regions showing high frequency of SNP per gene in 1 Mb interval between S. lycopersicum Heinz1706 and S. pimpinellifolium LA1589. (XLS) [file pone.0086387.s007.xls]

## Sheet: Sheet1
Supplementary Table 4: Genomic regions showing high frequency of SNP per gene in 1 Mb interval between S. lycopersicum Heinz1706 and S. pimpinellifolium LA1589.
Chromosome	Regions	SNPs	genes	SNP/gene
ch01	43 – 44mb	158	8	19.75
ch03	36 – 37mb	114	5	22.8
ch05	16 – 17mb	219	8	27.375
ch05	32 – 33mb	131	5	26.2
ch06	13 – 14mb	201	10	20.1
ch07	14 – 15mb	549	11	49.9091
ch07	21 – 22mb	357	12	29.75
ch07	33 – 34mb	164	8	20.5
ch07	34 – 35mb	79	2	39.5
ch08	22 – 23mb	555	18	30.8333
